# Supplementary material for: Peroxiredoxin 5 Silencing Sensitizes Dopaminergic Neuronal Cells to Rotenone via DNA Damage-Triggered ATM/p53/PUMA Signaling-Mediated Apoptosis
Source: PubMed Central journal article supplement (PMC7016837; doi:10.3390/cells9010022), 2019-12-19

**Fig. 4C**

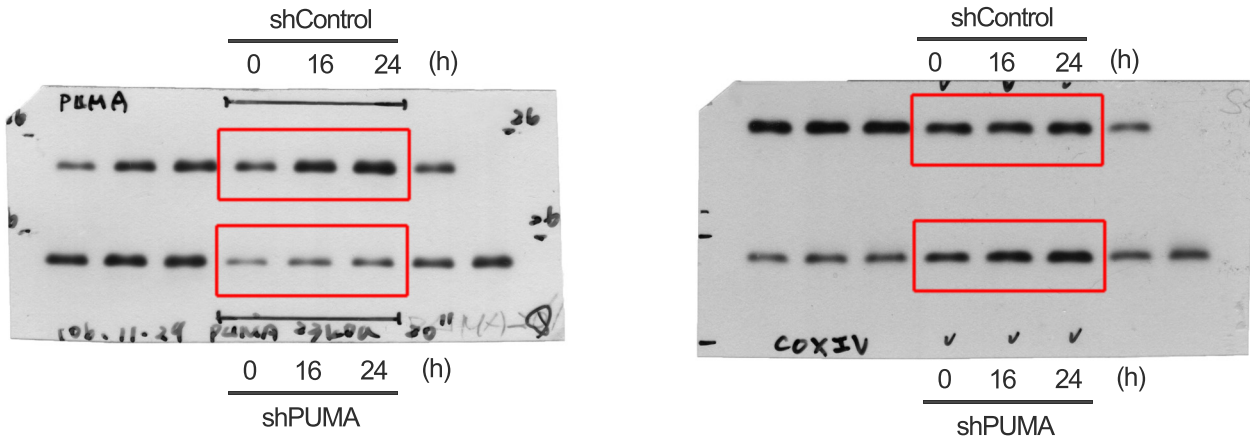

**Fig 4G**

upper: shControl  
lower: shPUMA

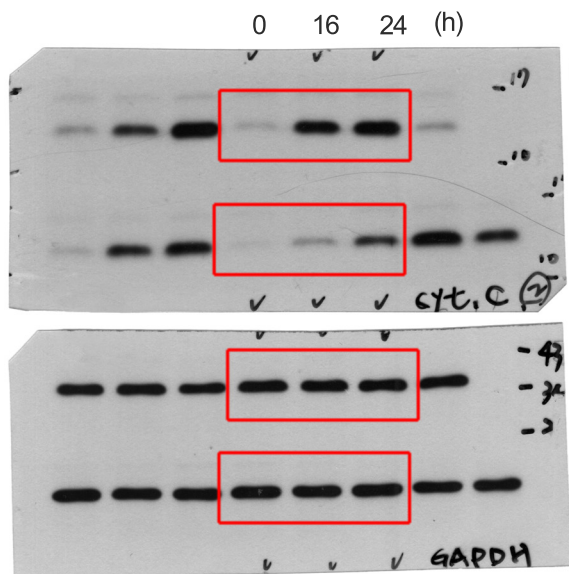

Cytosol

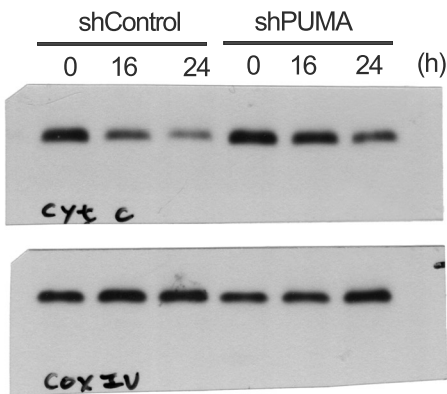

Mito

upper: shControl  
lower: shPUMA

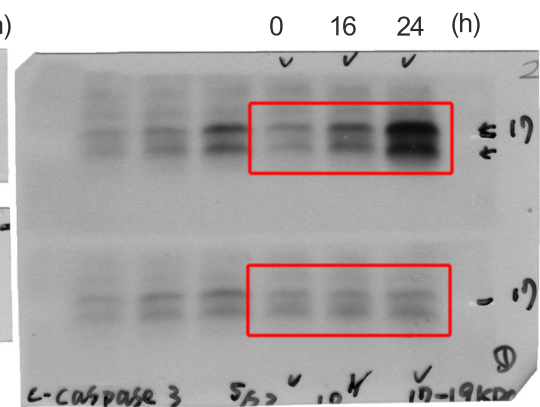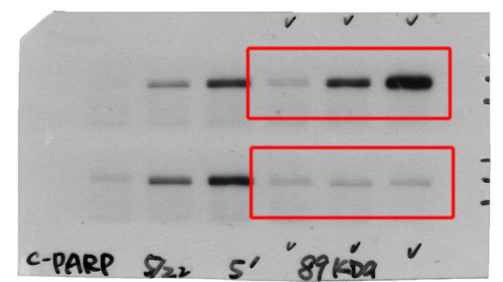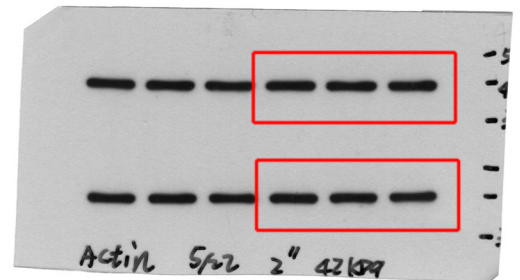

**Fig. 5D**

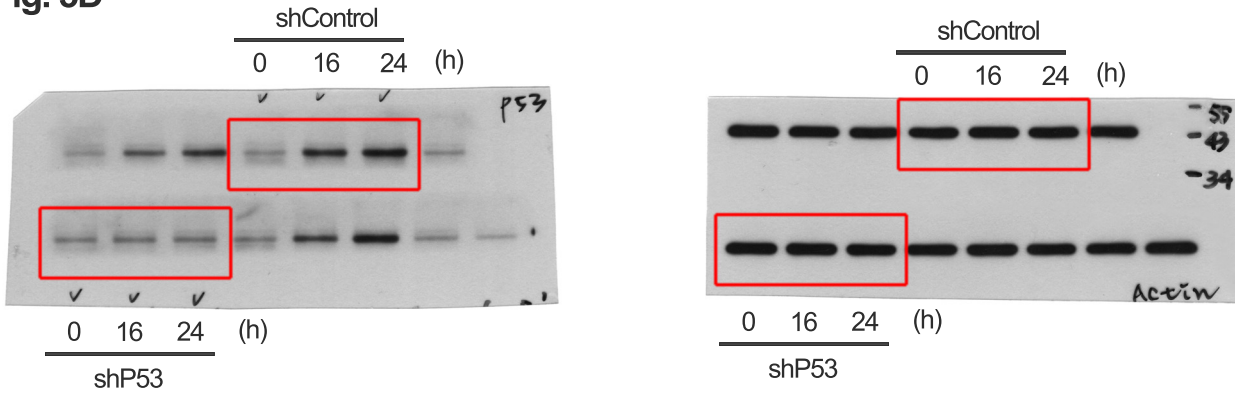

**Fig. 5H**

upper: shControl  
lower: shP53

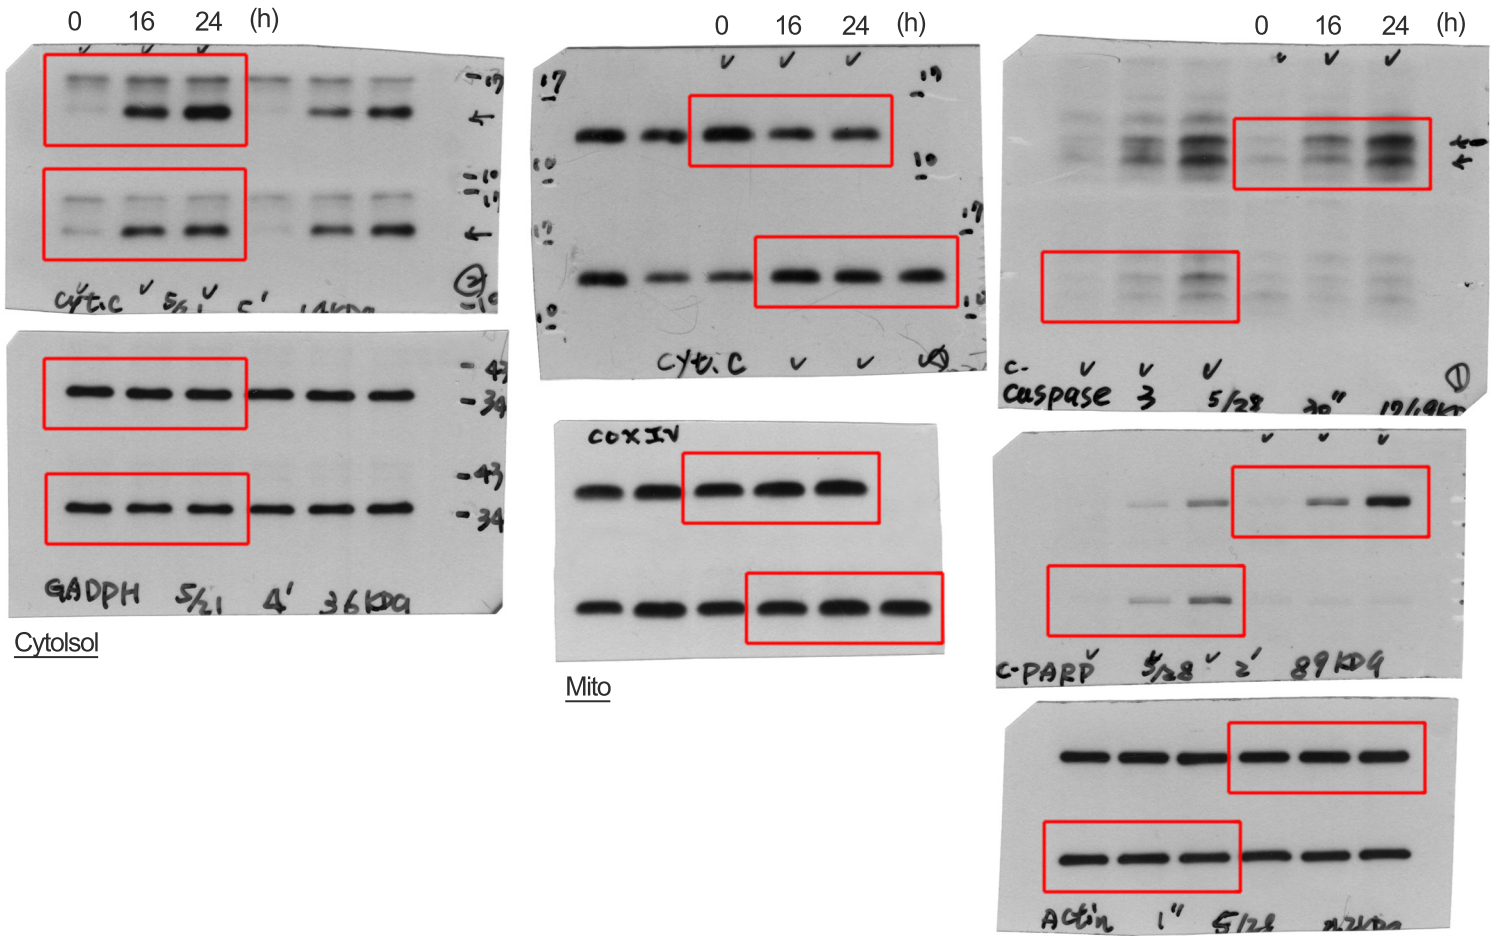

**Fig. 6D**

upper: shPrx5  
lower: shControl

|   |   |   |   |     |
|---|---|---|---|-----|
| - | + | + | + | Rot |
| - | - | 2 | 5 | KU  |

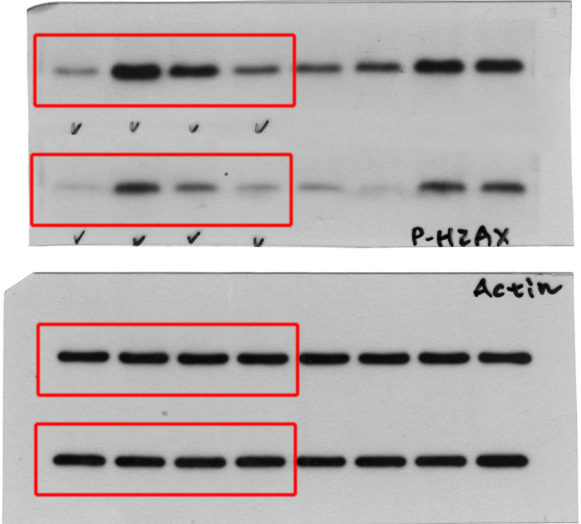

**Fig. 6E**

upper: shPrx5  
lower: shControl

|   |   |   |     |
|---|---|---|-----|
| - | + | + | Rot |
| - | - | + | KU  |

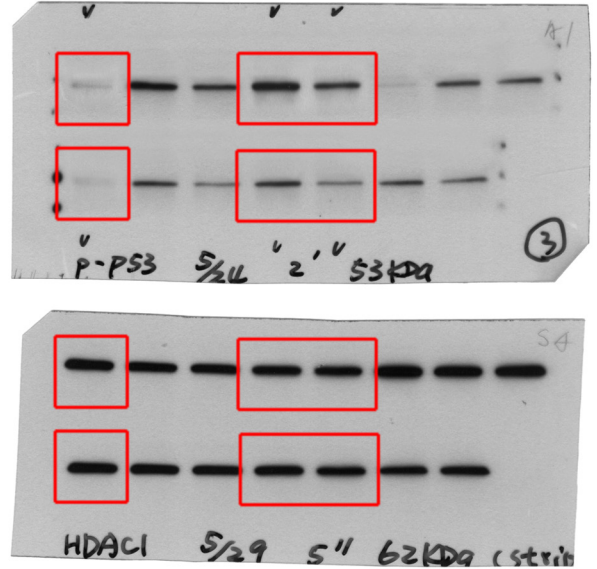

|   |   |   |     |
|---|---|---|-----|
| - | + | + | Rot |
| - | - | + | KU  |

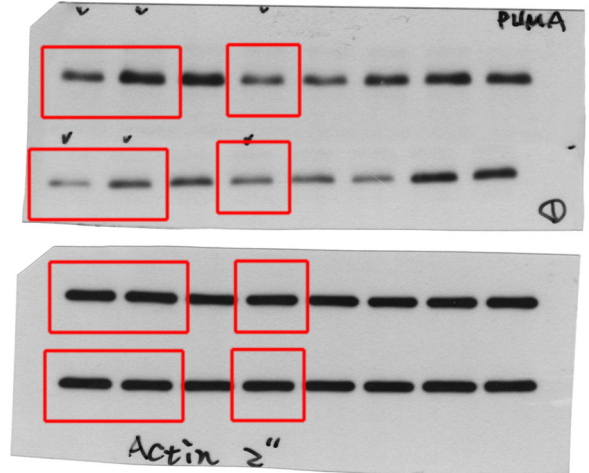

**Fig. 7C**

upper: shPrx5  
lower: shControl

|   |   |   |   |     |  |
|---|---|---|---|-----|--|
| - | + |   |   |     |  |
| - | - | + | + | Rot |  |
|   |   | 2 | 5 | Nac |  |

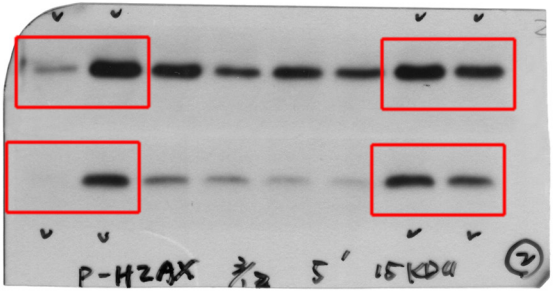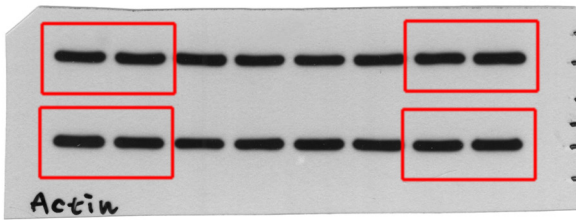

**Fig. 7D**

upper: shPrx5  
lower: shControl

|   |   |    |    |     |  |
|---|---|----|----|-----|--|
| - | + | +  | +  |     |  |
| - | - | 25 | 50 | Rot |  |
|   |   |    |    | Mn  |  |

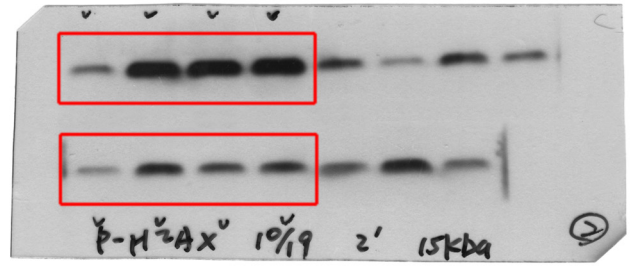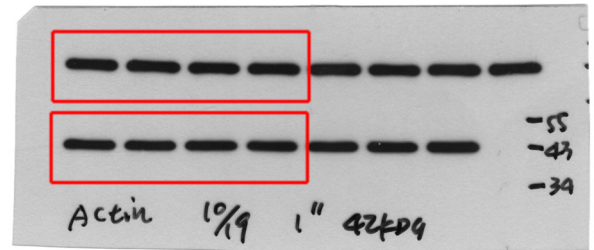

Supplement: cells-09-00022-s001.pdf [file cells-09-00022-s001.pdf]
